## A constraint network of interactions: protein–protein interaction analysis of the yeast type II phosphatase Ptc1p and its adaptor protein Nbp2p

Andrea Hruby, Mariel Zapatka, Sebastian Heucke, Lucia Rieger, Yehui Wu, Ute Nussbaumer, Steffi Timmermann, Alexander Dünkler and Nils Johnsson

*Journal of Cell Science* 124, 1603  
© 2011. Published by The Company of Biologists Ltd  
doi:10.1242/jcs.090944

There was an error published in *J. Cell Sci.* **124**, 35–46.

The Sl2p–Sl2p interaction reported in Fig. 8E was mistakenly not included in Table 1. The authors apologise for this error.
